# Supplementary material for: Simultaneous phase transformation and doping via a unique photochemical–electrochemical strategy to achieve a highly active Fe-doped Ni oxyhydroxide oxygen evolution catalyst
Source: Royal Society of Chemistry journal article supplement (doi:10.1039/d0ta09617b), 2021-01-01
Supplement: d0ta09617b1.pdf [file d0ta09617b1.pdf]

Electronic Supplementary Information

**Simultaneous phase transformation and doping via a unique photochemical-electrochemical strategy to highly active Fe-doped Ni oxyhydroxide oxygen evolution catalyst**

Lingya Yi, Yanli Niu, Bomin Feng, Ming Zhao, and Weihua Hu\*

Key Laboratory of Luminescence Analysis and Molecular Sensing (Southwest University), Ministry of Education; Institute for Clean Energy & Advanced Materials, School of Materials & Energy, Southwest University; Chongqing Key Laboratory for Advanced Materials and Technologies of Clean Energies, Chongqing 400715, China.

E-mail: [whhu@swu.edu.cn](mailto:whhu@swu.edu.cn)

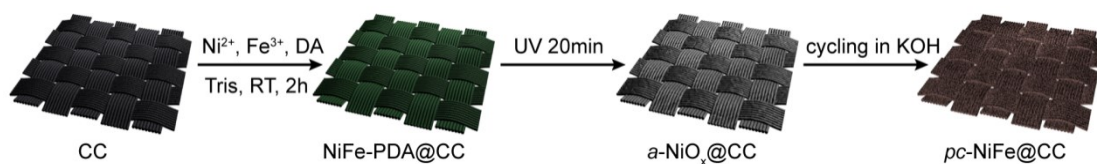

**Fig. S1** Schematic depiction of the synthesis of *pc*-NiFe@CC electrocatalyst.

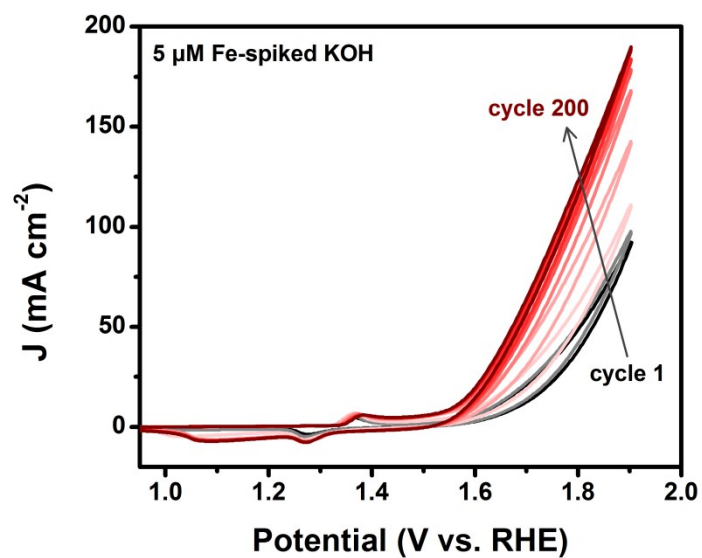

**Fig. S2** CV scans of *a*-NiO<sub>x</sub>@CC in 5  $\mu\text{M}$  Fe<sup>3+</sup> spiked 1.0 M KOH, scan rate: 100 mV s<sup>-1</sup>.

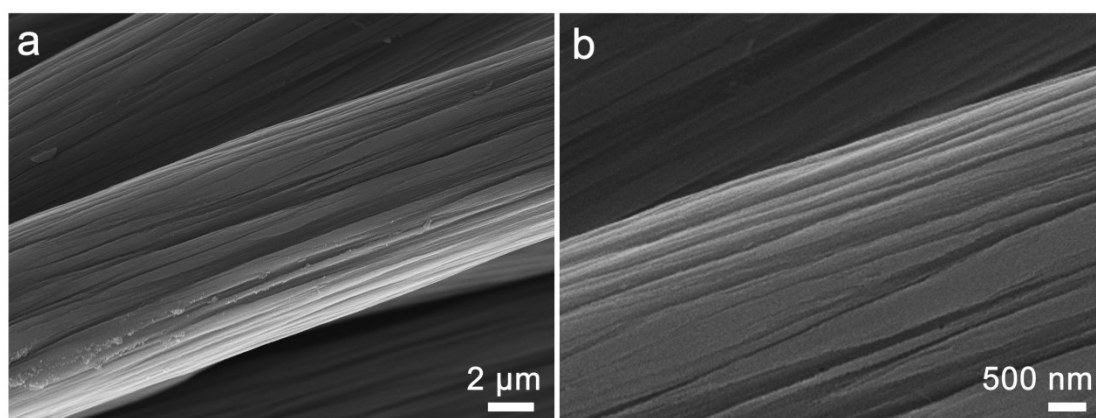

**Fig. S3** SEM images of bare CC. a, low magnification; b, high magnification.

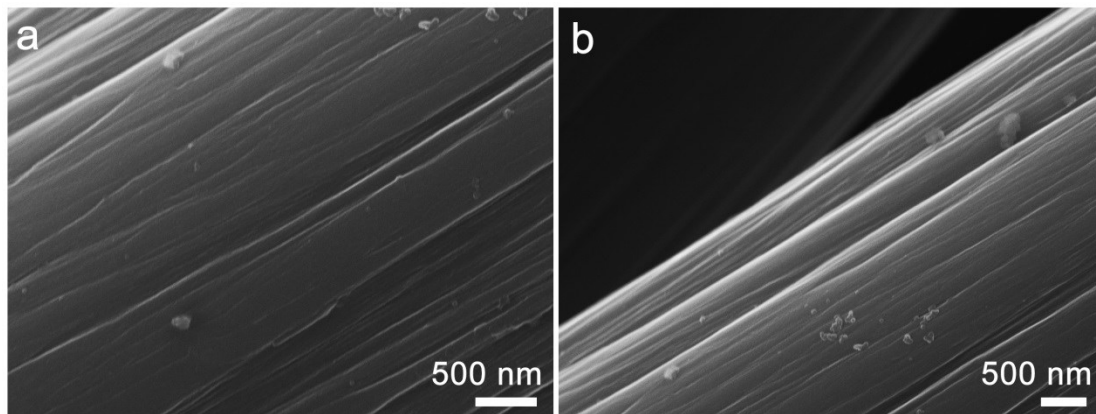

**Fig. S4** SEM images of Ni-PDA@CC. a, high magnification; b, low magnification.

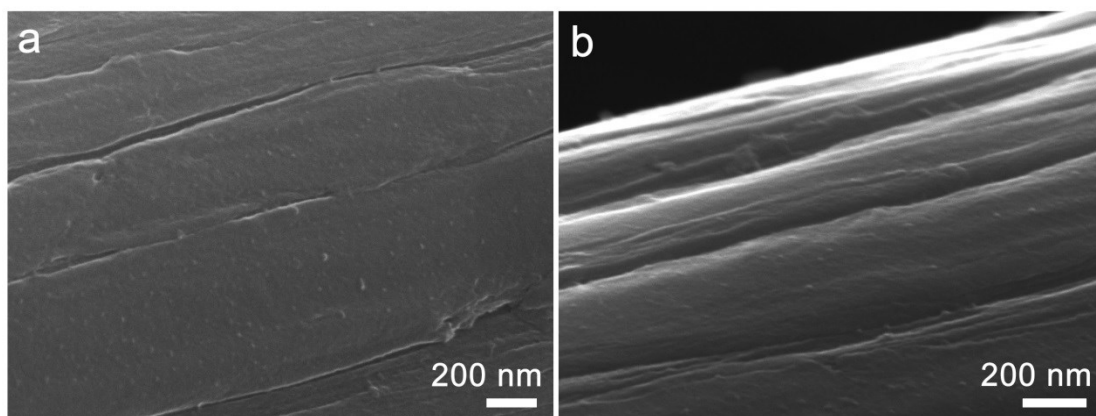

**Fig. S5** SEM images of *a*-NiO<sub>x</sub>@CC. a, high magnification; b, low magnification.

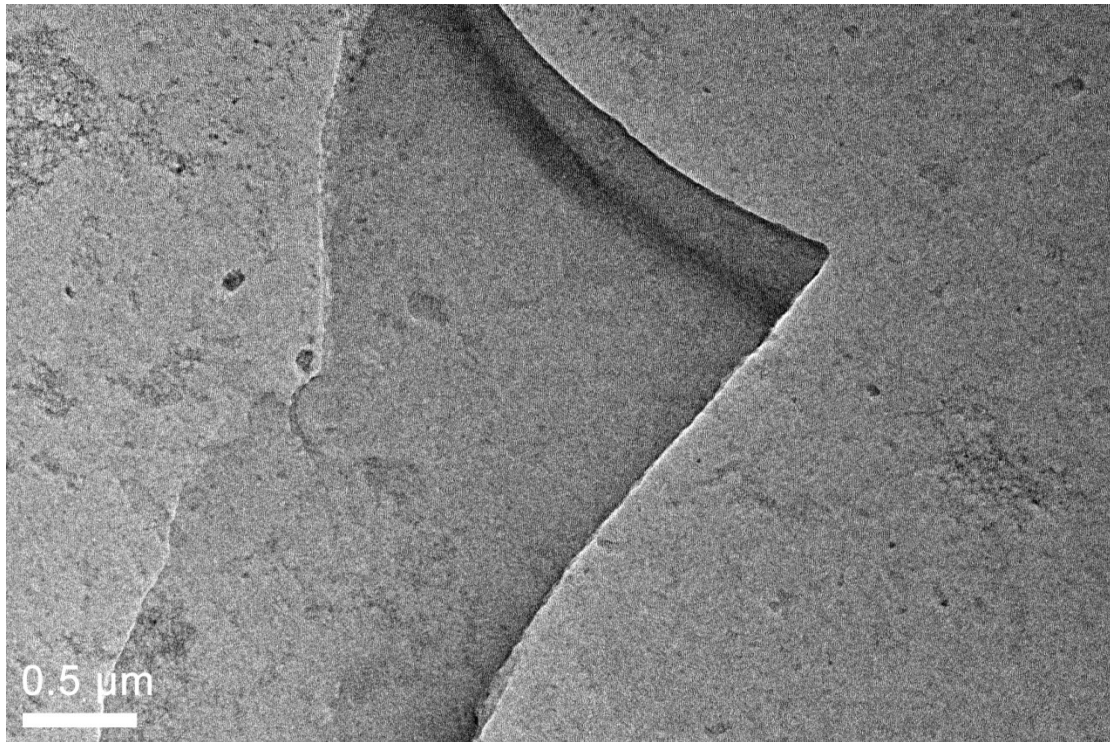

**Fig. S6** TEM image of nanosheets ultrasonically peeled from Fe-NiOOH@CC.

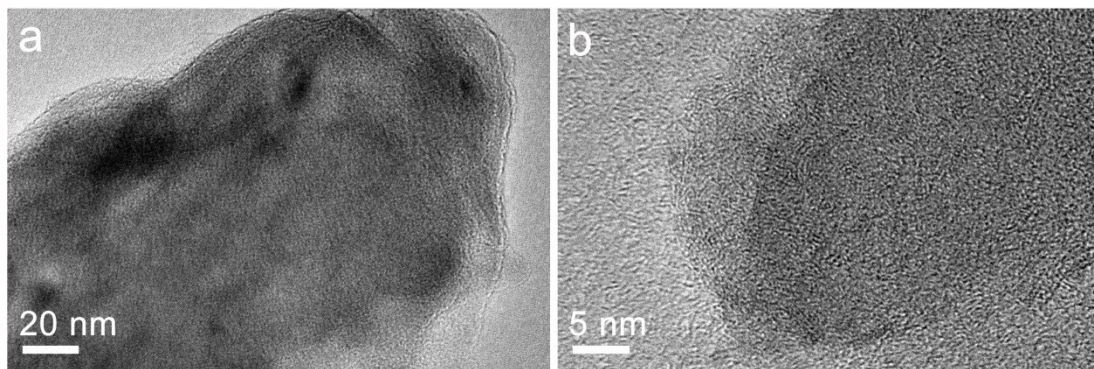

**Fig. S7** TEM images of ultrasonically peeled *a*-NiO<sub>x</sub>. a, low magnification; b, high magnification.

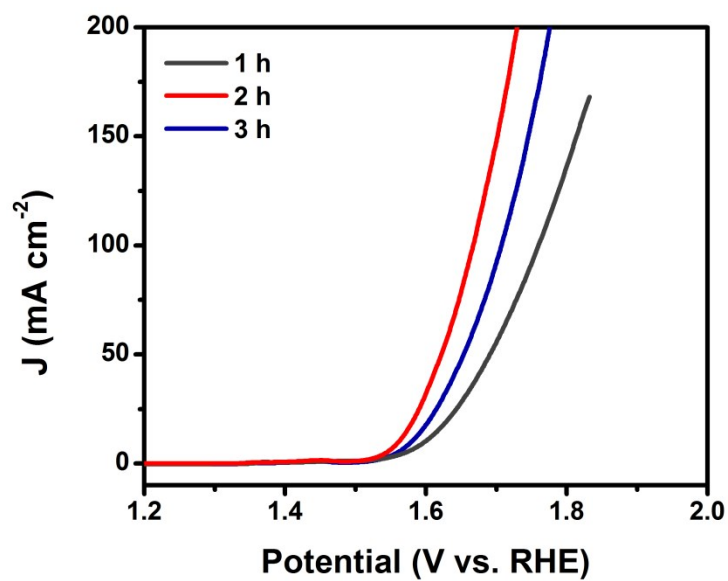

**Fig. S8** OER activity of Fe-NiOOH@CC synthesized with different duration of Ni-PDA deposition.

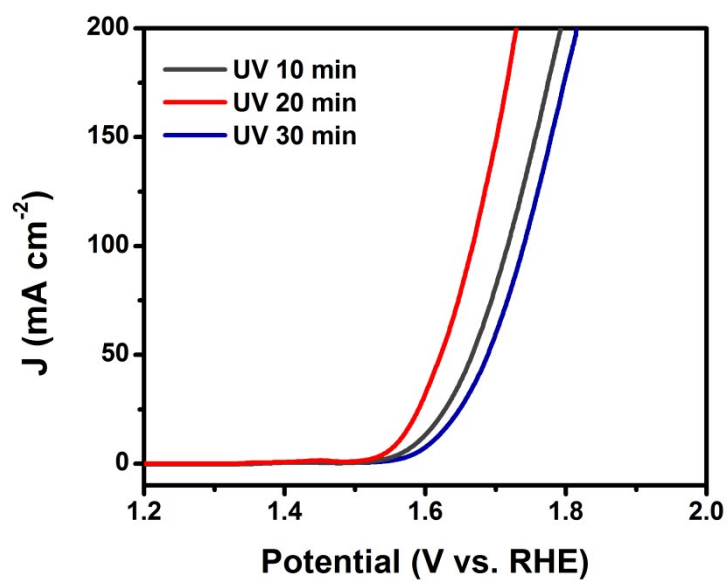

**Fig. S9** OER activity of Fe-NiOOH@CC synthesized with different duration of UV irradiation.



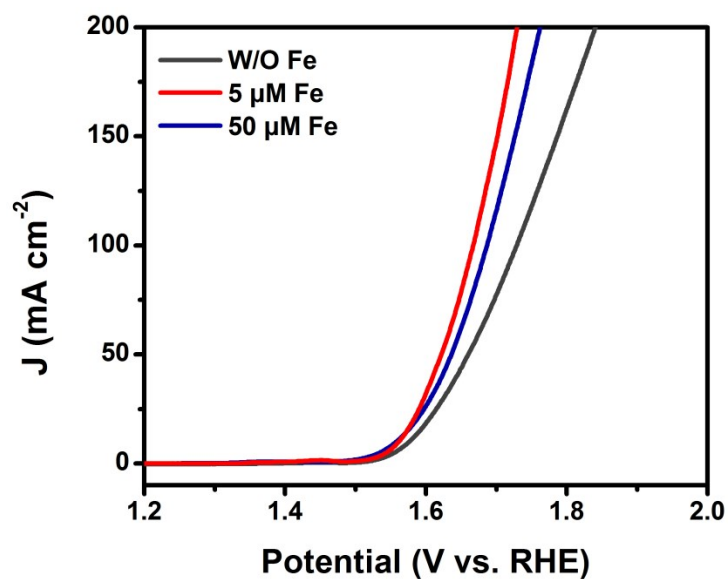

**Fig. S10** OER activity of Fe-NiOOH@CC synthesized with different Fe spiking concentration for cycling.

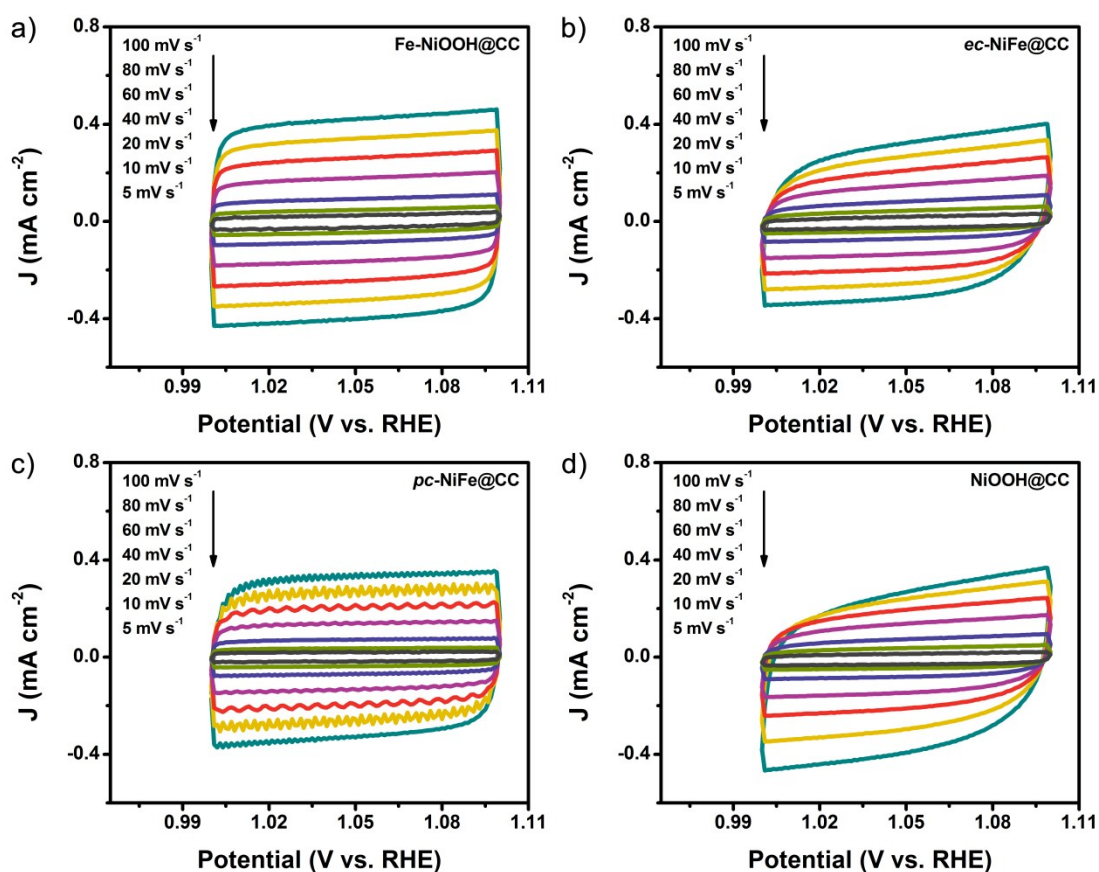

**Fig. S11** CV curves of Fe-NiOOH@CC (a), *ec*-NiFe@CC (b), *pc*-NiFe@CC (c) and NiOOH@CC (d) in 1.0 M KOH solution at different scanning rates.

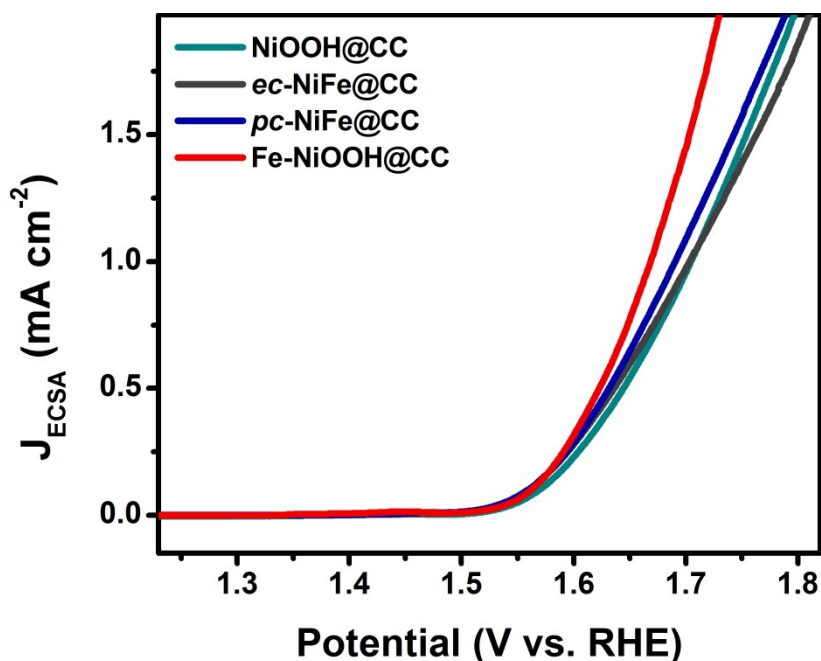

**Fig. S12** ECSA-normalized LSV curves of Fe-NiOOH@CC, *ec*-NiFe@CC, *pc*-NiFe@CC and NiOOH@CC with iR compensation. The ECSA of catalysts is

calculated from the double-layer capacitance according to equation:

$$ECSA = \frac{C_{dl}}{C_s},$$

where  $C_{dl}$  is the double-layer capacitance, estimated by the slope of a linear curve that obtained by plotting the non-Faradaic capacitive current ( $\Delta J/2$ , i.e.  $(J_a - J_c)/2$ ) against scanning rate;  $C_s$  is the specific capacitance of a planar surface. The  $C_s$  value is selected as  $0.04 \text{ mF cm}^{-2}$  in present work (see e.g., *J. Am. Chem. Soc.*, 2013, 135, 16977).

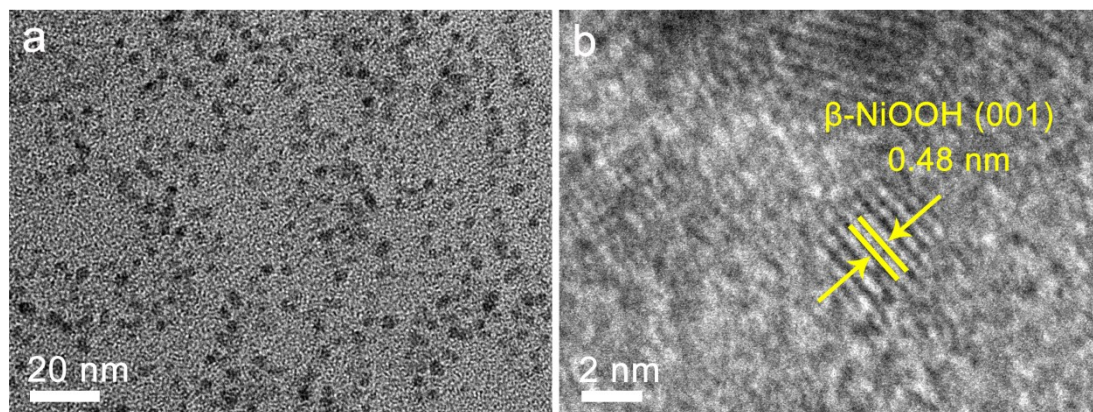

**Fig. S13** TEM images of Fe-NiOOH@CC after OER electrolysis.

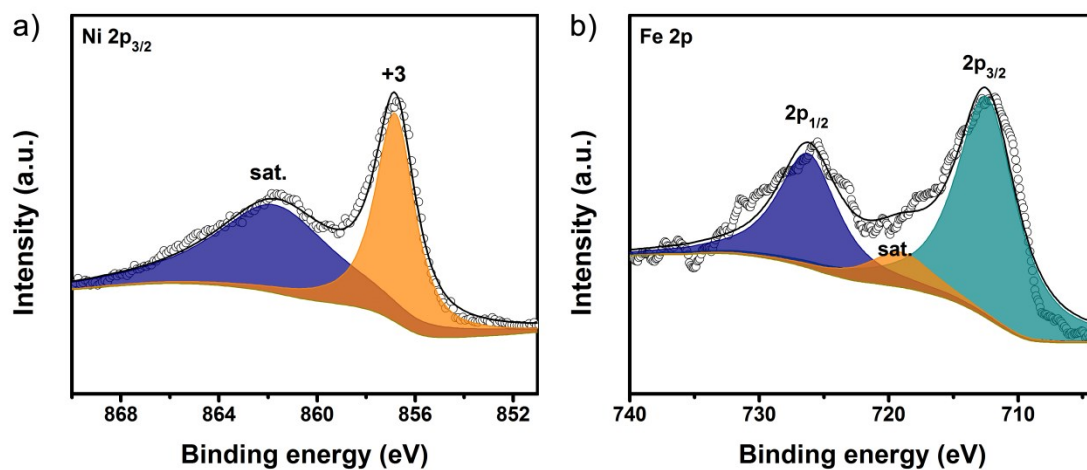

Fig. S14 Ni 2p (a) and Fe 2p (b) XPS spectra of Fe-NiOOH@CC after OER.

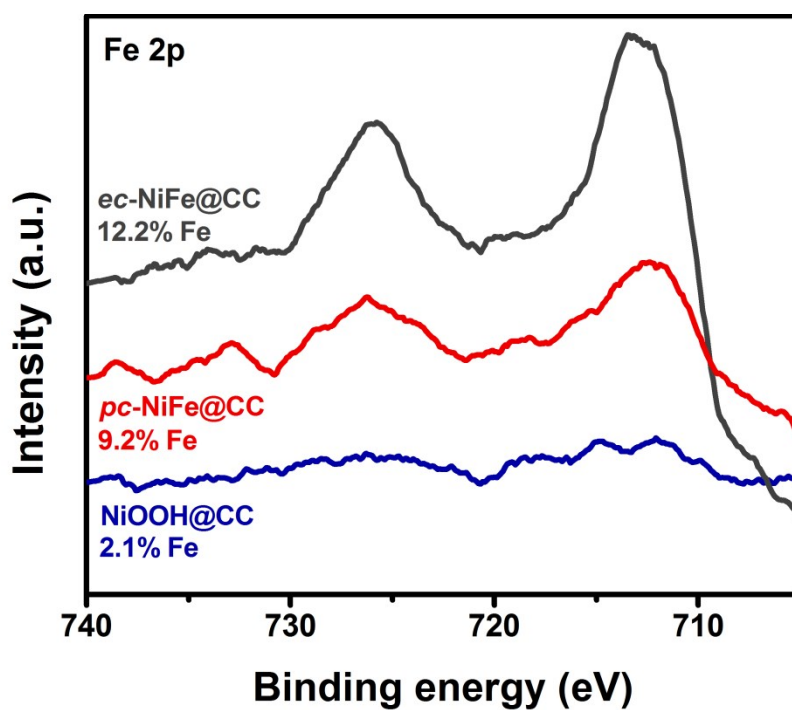

Fig. S15 XPS Fe 2p spectra of NiOOH@CC, *pc*-NiFe@CC and *ec*-NiFe@CC.



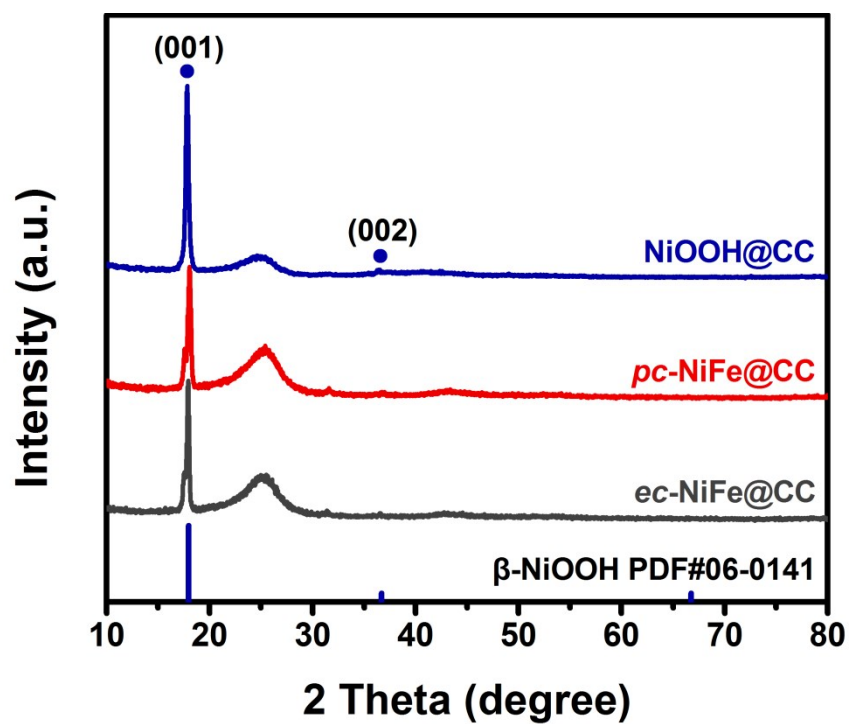

Fig. S16 XRD patterns of NiOOH@CC, *pc*-NiFe@CC and *ec*-NiFe@CC.

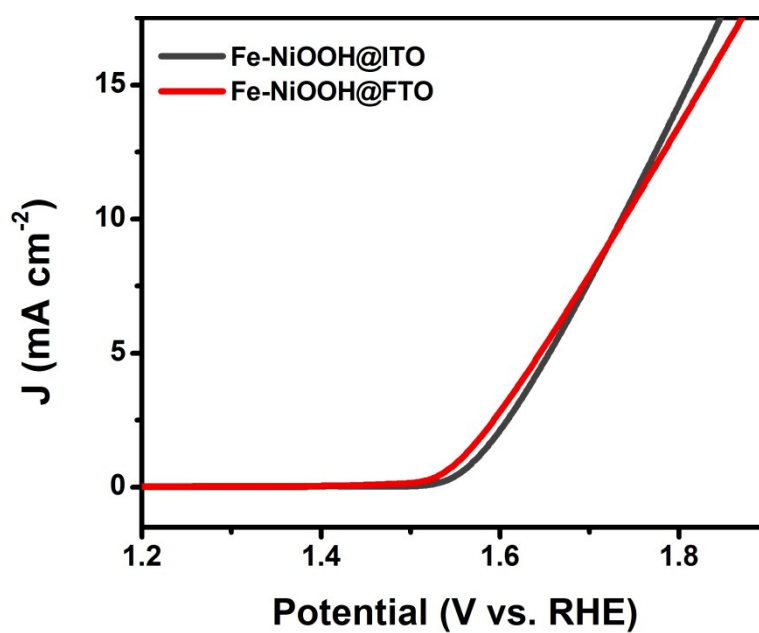

Fig. S17 LSV curves of Fe-NiOOH@ITO and Fe-NiOOH@FTO at 5 mV s<sup>-1</sup> in 1.0 M KOH.

**Table S1.** OER activity of NiFe-base catalysts in alkaline media reported in recent literature.

| Catalyst                                                 | $\eta@10 \text{ mA cm}^{-2}$<br>(mV) | Tafel slope<br>(mV dec <sup>-1</sup> ) | Stability                         | Electrolyte             | Morphology            | Substrate        | Ref.      |
|----------------------------------------------------------|--------------------------------------|----------------------------------------|-----------------------------------|-------------------------|-----------------------|------------------|-----------|
| <b>Fe-NiOOH@CC</b>                                       | 331                                  | 64                                     | 150 mA cm <sup>-2</sup> for 55 h  | 1.0 M KOH               | nanoparticle          | CC               | This work |
| <b>r-FeOOH/<math>\alpha</math>-Ni(OH)<sub>2</sub>/NF</b> | 168                                  | 51.4                                   | 2000 mA cm <sup>-2</sup> for 10 h | 1.0 M KOH               | particle              | NF <sup>a</sup>  | 1         |
| <b>NiFe LDH@NiCoP/NF</b>                                 | 220                                  | 48.6                                   | 10 mA cm <sup>-2</sup> for 100 h  | 1.0 M KOH               | nanosheet on nanowire | NF               | 2         |
| <b>NiFe LDH/NiTe</b>                                     | 228<br>@50 mA cm <sup>-2</sup>       | 51.04                                  | 20 mA cm <sup>-2</sup> for 30 h   | 1.0 M KOH               | nanosheet on nanorod  | NF               | 3         |
| <b>Ni-Fe-OH@Ni<sub>3</sub>S<sub>2</sub>/NF</b>           | 165                                  | 93                                     | 500 mA cm <sup>-2</sup> for 50 h  | 1.0 M KOH               | nanosheet             | NF               | 4         |
| <b>NiFe/N-CNT</b>                                        | 290                                  | 79                                     | 5000 cycles                       | 0.1 M KOH<br>(1600 rpm) | nanoparticle          | CNT <sup>b</sup> | 5         |

|                                |                                 |       |                                                                 |           |                        |    |    |
|--------------------------------|---------------------------------|-------|-----------------------------------------------------------------|-----------|------------------------|----|----|
| <b>CoFe@NiFe-200/NF</b>        | 190                             | 45.71 | 36 mA cm <sup>-2</sup> for 30 h                                 | 1.0 M KOH | nanosheet on nanosheet | NF | 6  |
| <b>NiFe-LDH/NF</b>             | 270                             | 67.44 | /                                                               | 1.0 M KOH | nanosheet              | NF | 6  |
| <b>NiFe LDH</b>                | 182                             | 34.34 | 1.7 V for 100 h                                                 | 1.0 M KOH | nanosheet              | NF | 7  |
| <b>NiFeRu-LDH</b>              | 225                             | 32.4  | 10 mA cm <sup>-2</sup> for 10 h                                 | 1.0 M KOH | nanosheet              | NF | 8  |
| <b>NiFe-LDH</b>                | 230                             | 36.2  | N.A.                                                            | 1.0 M KOH | nanosheet              | NF | 8  |
| <b>MIL-53(FeNi)/NF</b>         | 233<br>@50 mA cm <sup>-2</sup>  | 31.3  | 20, 50, 100 mA cm <sup>-2</sup><br>for 16000 s,<br>respectively | 1.0 M KOH | nanosheet              | NF | 9  |
| <b>4.3%-strained NiFe MOFs</b> | 210<br>@200 mA cm <sup>-2</sup> | 68    | 200 mA cm <sup>-2</sup> for 200 h                               | 0.1 M KOH | nanosheet              | NF | 10 |
| <b>pristine NiFe MOFs</b>      | 600<br>@200 mA cm <sup>-2</sup> | 167   | N.A.                                                            | 0.1 M KOH | nanosheet              | NF | 10 |

|                                |     |      |                                    |           |                          |                  |    |
|--------------------------------|-----|------|------------------------------------|-----------|--------------------------|------------------|----|
| <b>a-LaNiFe(t-d) hydroxide</b> | 189 | 36   | 10 mA cm <sup>-2</sup> for 100 h   | 1.0 M KOH | nanostructured amorphous | NF               | 11 |
| <b>ball-milled NiFe-LDH</b>    | 270 | 36.2 | N.A.                               | 1.0 M KOH | nanosheet                | GC <sup>c</sup>  | 12 |
| <b>NiFe-NFF</b>                | 227 | 38.9 | 10~20 mA cm <sup>-2</sup> for 15 h | 1.0 M KOH | nanocluster on nanosheet | NFF <sup>d</sup> | 13 |

<sup>a</sup> NF: nickel foam, <sup>b</sup> CNT: carbon nanotubes, <sup>c</sup> GC: glassy carbon electrode, <sup>d</sup> NFF: NiFe alloy foam.

## References

1. X. Cheng, J. Yuan, J. Cao, C. Lei, B. Yang, Z. Li, X. Zhang, C. Yuan, L. Lei and Y. Hou, *J. Colloid Interface Sci.*, 2020, 579, 340-346.
2. H. Zhang, X. Li, A. Haehnel, V. Naumann, C. Lin, S. Azimi, S. L. Schweizer, A. W. Maijenburg and R. B. Wehrspohn, *Adv. Funct. Mater.*, 2018, 28, 1706847.
3. L. Hu, X. Zeng, X. Wei, H. Wang, Y. Wu, W. Gu, L. Shi and C. Zhu, *Appl. Catal. B-Environ.*, 2020, 273, 119014.
4. X. Zou, Y. Liu, G. Li, Y. Wu, D. Liu, W. Li, H. Li, D. Wang, Y. Zhang and X. Zou, *Adv. Mater.*, 2017, 29, 1700404.

5. H. Lei, Z. Wang, F. Yang, X. Huang, J. Liu, Y. Liang, J. Xie, M. S. Javed, X. Lu, S. Tan and W. Mai, *Nano Energy*, 2020, 68, 104293.
6. R. Yang, Y. Zhou, Y. Xing, D. Li, D. Jiang, M. Chen, W. Shi and S. Yuan, *Appl. Catal. B-Environ.*, 2019, 253, 131-139.
7. Z. Qiu, C. W. Tai, G. A. Niklasson and T. Edvinsson, *Energy Environ. Sci.*, 2019, 12, 572-581.
8. G. Chen, T. Wang, J. Zhang, P. Liu, H. Sun, X. Zhuang, M. Chen and X. Feng, *Adv. Mater.*, 2018, 30, 1706279.
9. F. Sun, G. Wang, Y. Ding, C. Wang, B. Yuan and Y. Lin, *Adv. Energy Mater.*, 2018, 8, 1800584.
10. W. Cheng, X. Zhao, H. Su, F. Tang, W. Che, H. Zhang and Q. Liu, *Nat. Energy*, 2019, 4, 115-122.
11. G. Chen, Y. Zhu, H. M. Chen, Z. Hu, S. Hung, N. Ma, J. Dai, H. Lin, C. Chen, W. Zhou and Z. Shao, *Adv. Mater.*, 2019, 31, 1900883.
12. D. Zhou, S. Wang, Y. Jia, X. Xiong, H. Yang, S. Liu, J. Tang, J. Zhang, D. Liu, L. Zheng, Y. Kuang, X. Sun and B. Liu, *Angew. Chem. Int. Ed.*, 2019, 58, 736-740.
13. C. Cao, D. Ma, Q. Xu, X. Wu and Q. Zhu, *Adv. Funct. Mater.*, 2019, 29, 1807418.
